# Supplementary material for: Heterotelechelic poly(propylene oxide) as migration-inhibited toughening agent in hot lithography based additive manufacturing
Source: Royal Society of Chemistry journal article supplement (doi:10.1039/d0py01746a), 2021-01-01
Supplement: d0py01746a1.pdf [file d0py01746a1.pdf]

## Electronic Supplementary Information

### Heterotelechelic Poly(propylene oxide) as Migration-Inhibited Toughening Agent in Hot Lithography Based Additive Manufacturing

Daniel Grunenberg,<sup>a</sup> Katharina Ehrmann,<sup>a</sup> Christian Gorsche,<sup>a,b</sup> Bernhard Steyrer,<sup>c</sup> Thomas Koch,<sup>c</sup> Jürgen Stampfl,<sup>c</sup> and Robert Liska<sup>\*a</sup>

<sup>a</sup> Institute of Applied Synthetic Chemistry, Technische Universität Wien, Getreidemarkt 9/163-MC, 1060 Vienna (Austria)

<sup>b</sup> Cubicure GmbH, Gutheil-Schoder-Gasse 17, Tech Park Vienna (TPV), 1230 Vienna (Austria)

<sup>c</sup> Institute of Materials Science and Technology, Technische Universität Wien, Getreidemarkt 9/308, 1060 Vienna (Austria)

#### Contents

|                                                                               |    |
|-------------------------------------------------------------------------------|----|
| 1. NMR Analyses of Synthesized Oligomers.....                                 | S2 |
| 2. Side Reaction of Tosyl Chloride and Hydrochinone.....                      | S3 |
| 3. DMTA, Tensile Testing, Dynstat, and Swelling Data.....                     | S4 |
| 4. Image of the Printed Specimens for DMTA, Tensile Testing, and Dynstat..... | S5 |

## 1. NMR Analyses of Synthesized Oligomers

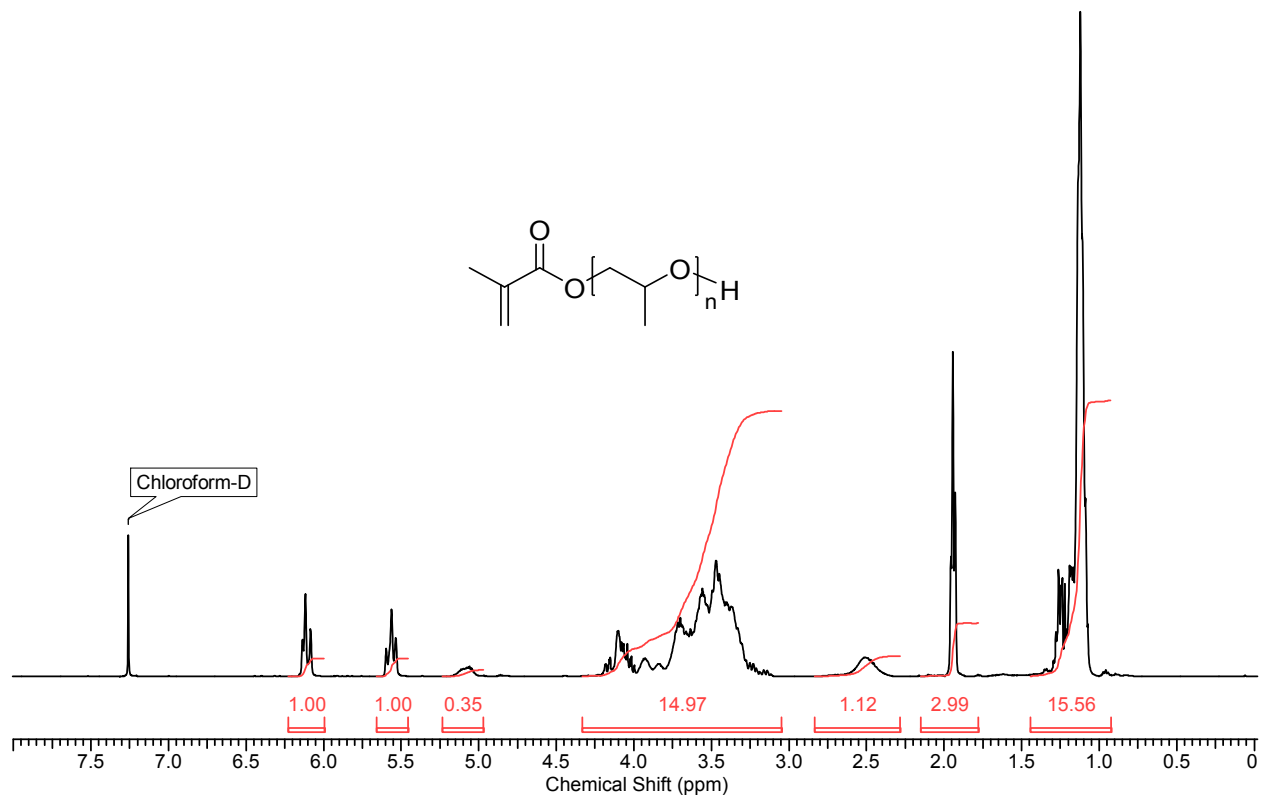Figure S1: 400 MHz <sup>1</sup>H NMR spectrum of the starting material Bisomer PPM 5 LI.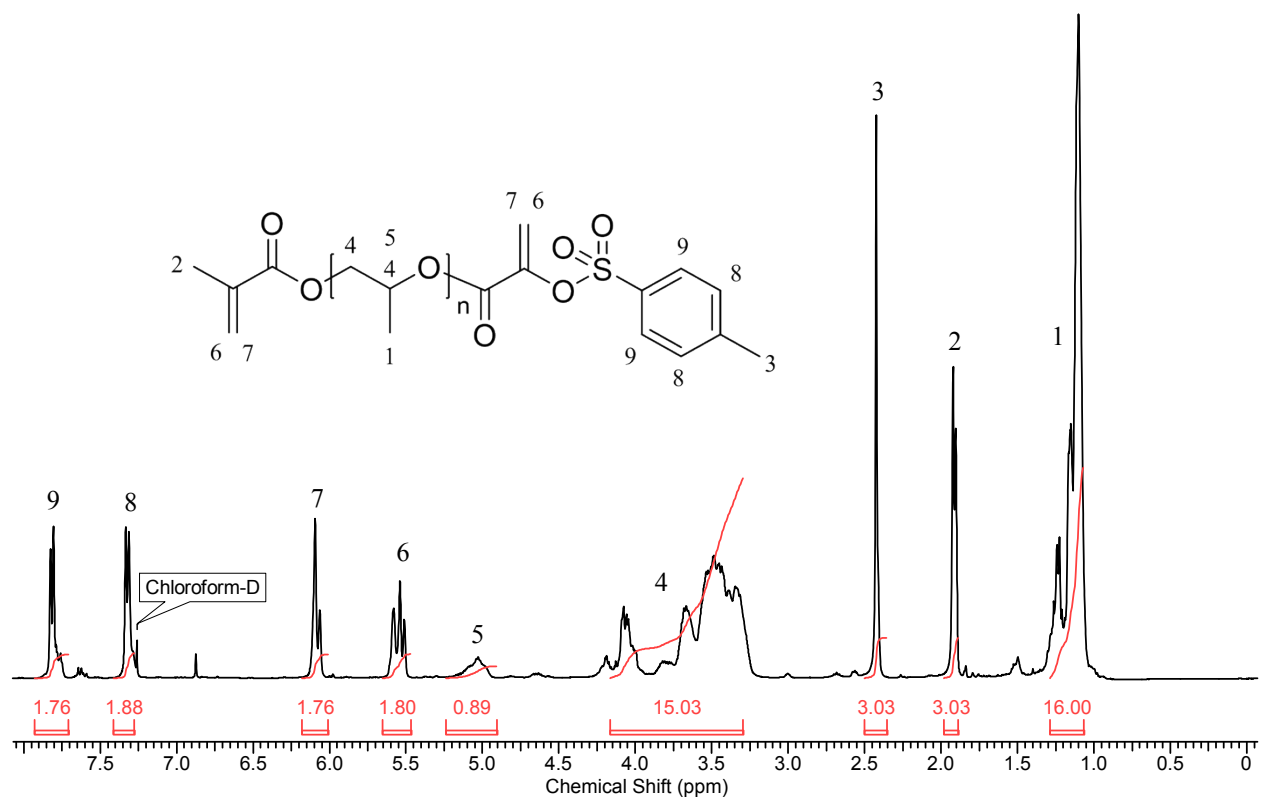Figure S2: 400 MHz <sup>1</sup>H NMR spectrum of PPO Hybrid (PPO-H).

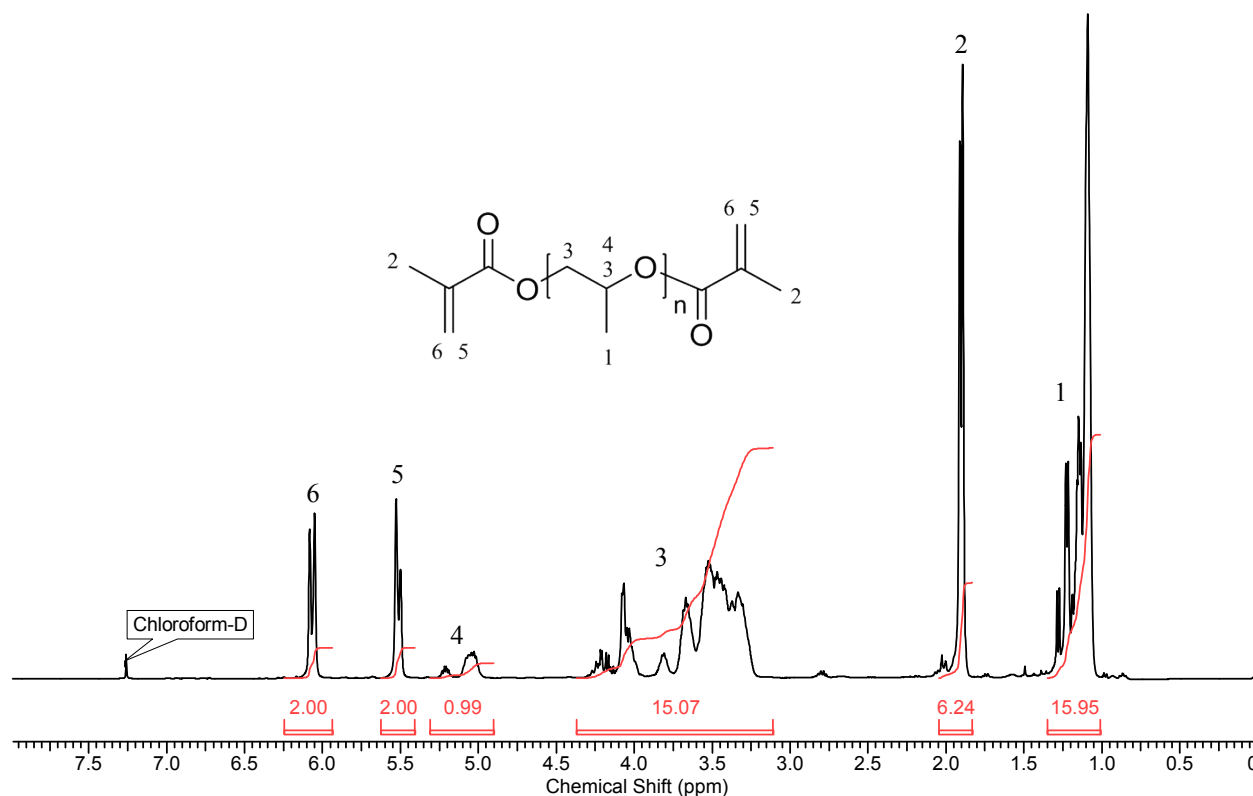Figure S3: 400 MHz <sup>1</sup>H NMR spectrum of PPO Dimethacrylate (PPO-D).

## 2. Side Reaction of Tosyl Chloride and Hydroquinone

Previous experiments showed that for the synthesis of PPO-H, concentrated sulfuric acid was the most efficient transesterification catalyst. However, 3 wt% of hydroquinone had to be used in order to prevent premature polymerization. As the hydroquinone was hard to remove after the first reaction step, 1,4-Phenylene bis(4-methylbenzenesulfonate) was formed as a side product during the second reaction step. Most of the side product could be removed during workup. Nevertheless, traces can still be seen in the <sup>1</sup>H NMR spectrum of PPO-H.

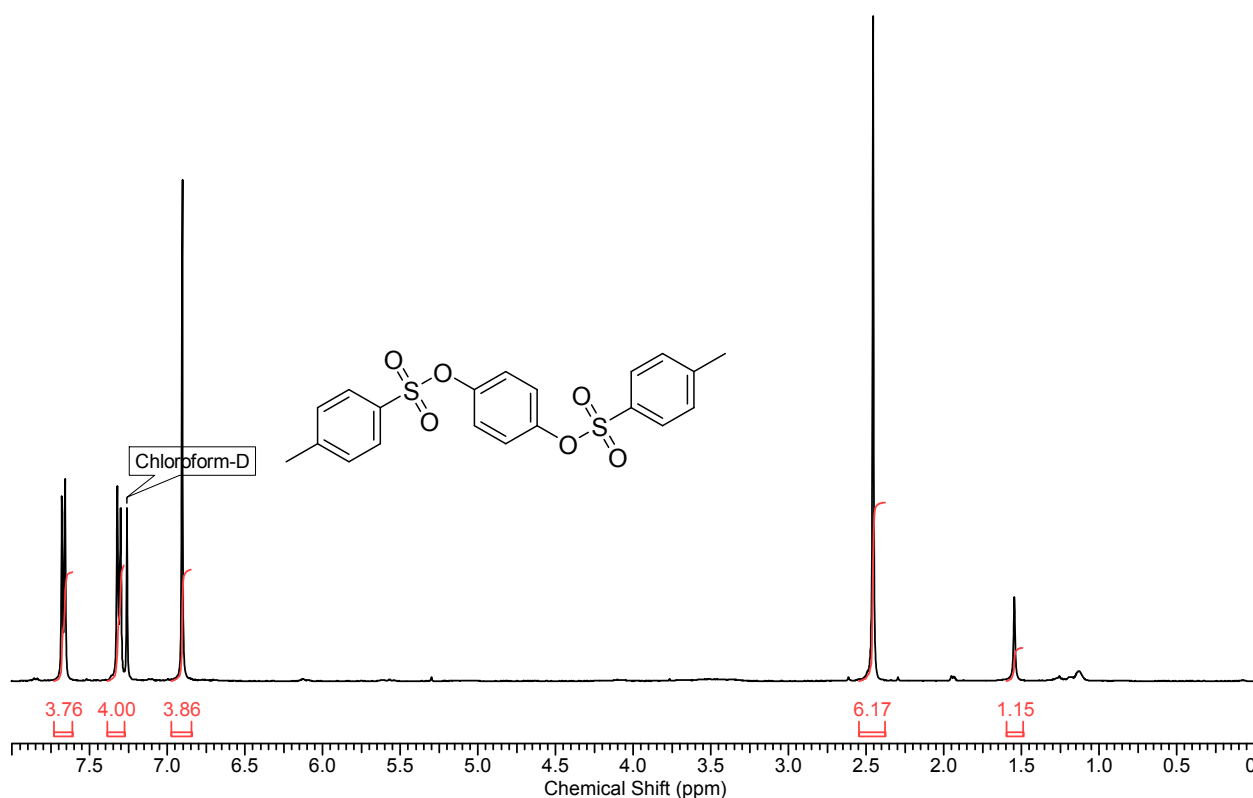

Figure S4: 400 MHz <sup>1</sup>H NMR spectrum of 1,4-Phenylene bis(4-methylbenzenesulfonate) as the side product during PPO-H synthesis.

### 3. DMTA, Tensile Testing, Dynstat, and Swelling Data

In the following table, data obtained from DMTA, tensile tests, dynstat experiments, and swelling experiments discussed and depicted in Figures 2-5 and 7-10 in the paper are given. Figure S5 displays representative stress-strain curves of all discussed materials.

Table S1: Thermomechanical characteristics for moulded and 3D printed specimens made from pure Bomar and Bomar with 10 - 25 db% poly(propylene oxide) dimethacrylate (PPO-D) or poly(propylene oxide) hybrid monomer (PPO-H): DMTA results (glass transition temperature ( $T_g$ ), storage moduli at 25 °C ( $G'_{25}$ , as a measure for the onset of storage modulus decrease) and at the rubber plateau ( $G'_{rubber}$ )); tensile testing results (ultimate tensile stress ( $\sigma_M$ ), strain at break ( $\epsilon_B$ ), and energy at break ( $E_B$ , calculated from the area under the stress-strain curve)); impact strength (a) obtained from dynstat measurements; : swellability (S) and gel fraction (G)

| Formulation   | $T_g / ^\circ\text{C}^1$ | $G'_{25} / \text{Pa}^2$ | $G'_{rubber} / \text{Pa}^3$ | $\sigma_M$ [MPa] | $\epsilon_B$ [%] | $E_B$ [MJ m <sup>-3</sup> ] | a [kJ m <sup>-2</sup> ] | S [%]       | G [%]      |
|---------------|--------------------------|-------------------------|-----------------------------|------------------|------------------|-----------------------------|-------------------------|-------------|------------|
| Bomar         | 109                      | $1.79 \cdot 10^9$       | $1.30 \cdot 10^7$           | $76.0 \pm 2.2$   | $14.3 \pm 4.2$   | $8.1 \pm 2.7$               | $12.7 \pm 4.1$          | $123^4$     | $100^4$    |
| PPO-D "10 %"  | 102                      | $1.56 \cdot 10^9$       | $1.36 \cdot 10^7$           | $70.9 \pm 2.3$   | $17.3 \pm 6.3$   | $9.5 \pm 3.8$               | $14.5 \pm 3.1$          | $123 \pm 1$ | $100^4$    |
| PPO-D "15 %"  | 101                      | $1.53 \cdot 10^9$       | $1.54 \cdot 10^7$           | $66.8 \pm 2.6$   | $19.2 \pm 7.6$   | $9.2 \pm 3.9$               | $14.4 \pm 5.0$          | $122^4$     | $99^4$     |
| PPO-D "20 %"  | 101                      | $1.42 \cdot 10^9$       | $1.73 \cdot 10^7$           | $61.0 \pm 2.2$   | $17.7 \pm 5.1$   | $8.6 \pm 2.9$               | $15.3 \pm 3.2$          | $121^4$     | $99^4$     |
| PPO-D "25 %"  | 99                       | $1.15 \cdot 10^9$       | $1.70 \cdot 10^7$           | $55.5 \pm 3.2$   | $14.7 \pm 6.6$   | $6.6 \pm 3.5$               | $15.2 \pm 1.4$          | $120 \pm 1$ | $99^4$     |
| PPO-H 10 %    | 86                       | $1.50 \cdot 10^9$       | $7.85 \cdot 10^6$           | $63.0 \pm 1.6$   | $32 \pm 17$      | $15.1 \pm 7.8$              | $19.7 \pm 3.7$          | $130 \pm 1$ | $98^4$     |
| PPO-H 10 % 3D | 88                       | $1.52 \cdot 10^9$       | $8.94 \cdot 10^6$           | $59.0 \pm 1.2$   | $20.2 \pm 5.1$   | $9.0 \pm 2.2$               | $7.8 \pm 1.0$           | $126 \pm 1$ | $99^4$     |
| PPO-H 15 %    | 76                       | $1.33 \cdot 10^9$       | $6.52 \cdot 10^6$           | $54.1 \pm 1.6$   | $54 \pm 18$      | $21.5 \pm 7.5$              | $24.4 \pm 2.2$          | $133^4$     | $97^4$     |
| PPO-H 15 % 3D | 78                       | $1.39 \cdot 10^9$       | $7.47 \cdot 10^6$           | $50.5 \pm 0.9$   | $38 \pm 17$      | $14.1 \pm 6.8$              | $11.8 \pm 4.1$          | $128^4$     | $99^4$     |
| PPO-H 20 %    | 66                       | $1.10 \cdot 10^9$       | $5.35 \cdot 10^6$           | $43.0 \pm 2.9$   | $84 \pm 14$      | $30.0 \pm 6.3$              | $28.2 \pm 2.1$          | $139 \pm 1$ | $94 \pm 1$ |
| PPO-H 25 %    | 55                       | $7.48 \cdot 10^9$       | $4.05 \cdot 10^6$           | $34.7 \pm 4.7$   | $112 \pm 16$     | $29.2 \pm 5.7$              | $47.4 \pm 6.1$          | $154 \pm 3$ | $87 \pm 2$ |

<sup>1</sup> determined from the maximum of the loss factor curve

<sup>2</sup> first  $G'$  value at/after 25.0°C

<sup>3</sup> mean of all  $G'$  values between 141 and 200 °C

<sup>4</sup> deviation of triplicates < 0.5%

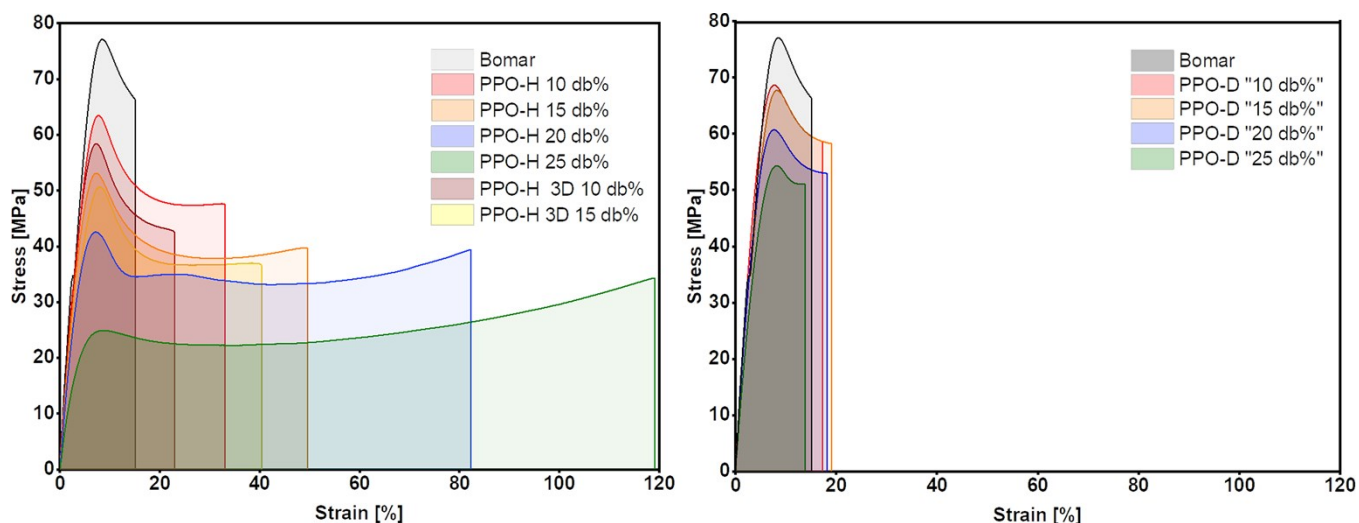

Figure S5: Representative stress-strain curves of PPO-H containing testing specimens (left) and PPO-D containing testing specimens (right) compared to only Bomar-containing testing specimens

#### 4. Image of the Printed Specimens for DMTA, Tensile Testing, and Dynstat

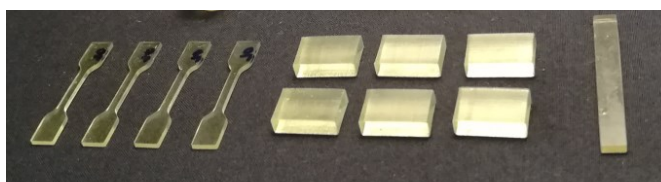

Figure S6: Image of the 3D-printed specimens for tensile testing (left), dynstat testing (middle), and DMTA (right)
